# Supplementary material for: A genus-wide pangenome of Hordeum
Source: Research Square preprint supplement (doi:10.21203/rs.3.rs-7766969/v1), 2025-10-28
Supplement: Supplementary file 1 [file 4376db5aa682b8acc792aef3.xlsx]

## Sheet: 1
Summary statistics of genome assemblies.
Number	Species	Ploidy	Types of cytogenetic subgenomes	Accession Number	N50	Assembly Size	Unanchored contigs	-/Haplotype 1/Subgenome 1 Pseudomolecules	Haplotype 2/Subgenome 2 Pseudomolecules	Chloroplast genome size
1	Hordeum vulgare	Diploid	H	Morex	28658690	4481669561	29110253	4196495466	-	136462
2	Hordeum bogdanii	Diploid	I	H240	65796082	4104461626	114730427	3989741499	-	137036
3	Hordeum brevisubulatum	Diploid	I	PI401390	175949922	4030576268	295775984	3734804884	-	137079
4	Hordeum bulbosum	Diploid	H	FB19-011-3	10046997	6938833664	161061028	3587046874	3624591932	136709
5	Hordeum californicum	Diploid	I	BCC2058	26360265	3766386079	35256381	3731152398	-	136335
6	Hordeum chilense	Diploid	I	GRA1000	41219677	3589715771	18366284	3571363587	-	136894
7	Hordeum comosum	Diploid	I	NGB18417	33280239	3818514759	54492025	3764041034	-	137067
8	Hordeum cordobense	Diploid	I	BCC2067	13109500	3890302627	40968313	3849379814	-	136991
9	Hordeum erectifolium	Diploid	I	NGB6816	17289503	4040134212	98663384	3897072793	-	136904
10	Hordeum euclaston	Diploid	I	NGB90233	18240935	2903061517	54073869	2849010748	-	136900
11	Hordeum flexuosum	Diploid	I	BCC2023	21079894	3527472438	31555468	3495942470	-	136952
12	Hordeum gussoneanum	Diploid	Xa	BCC2005	34760406	4315124475	34977621	4280165754	-	136868
13	Hordeum intercedens	Diploid	I	NGB15676	17633556	2918452048	61038921	2857436227	-	136944
14	Hordeum jubatum	Tetraploid	I	BCC2055	102881584	7489204145	23142997	3659551459	3806522689	136821
15	Hordeum marinum	Diploid	Xa	BCC2001	50878230	3814399990	39761933	3774652457	-	136769
16	Hordeum murinum	Tetraploid	Xu	BCC2009	11888159	8248808406	156310545	3751088090	4341542971	136508
17	Hordeum murinum	Diploid	Xu	BCC2017	10862558	3759323328	107132973	3693194866	-	136543
18	Hordeum muticum	Diploid	Xu	NGB90062	135313139	4011133073	17692237	3993447036	-	137047
19	Hordeum patagonicum	Diploid	I	BCC2065	20409892	3904380502	72958797	3831454105	-	136924
20	Hordeum pubiflorum	Diploid	I	BCC2028	18148128	3599195184	42210256	3557014628	-	136924
21	Hordeum pusillum	Diploid	I	NGB6888	22524743	2960853517	65738244	2895134373	-	136781
22	Hordeum roshevitzii	Diploid	I	BCC2069	57003328	4031965881	90922603	3941054678	-	137020
23	Hordeum secalinum	Tetraploid	I	BCC2004	46397946	8559758592	125462143	4676868179	3757464070	136642
24	Hordeum stenostachys	Diploid	I	NGB90152	12559294	3965068413	96724042	3868390271	-	136964
25	Hordeum marinum	Diploid	Xa	H559	6835372	3815875950	174368387	3641580563	-	-

## Sheet: 2
Summary statistics and accession codes of HiFi and Hi-C data.
species	sample	country of origin	tissue	tissue_place	HiC	HiFi	HiC coverage	Hifi coverage
Hordeum bogdanii	H 240	Afghanistan	Young leaf	Tottori, Japan	Novaseq6000 IPK, Germany	Sequel2 Kazusa, Japan	31.2398	38.3179
Hordeum brevisubulatum	PI401390	Iran	Young leaf	IPK Gatersleben, Germany	Novaseq6000 IPK, Germany	Sequel2 IPK, Germany	42.5819	63.0326
Hordeum californicum	BCC 2058	USA	Young leaf	IPK Gatersleben, Germany	Novaseq6000 IPK, Germany	Sequel2 Wisconsin, US	46.5618	33.1462
Hordeum chilense	GRA 1000	Unknown	Young leaf	IPK Gatersleben, Germany	Novaseq6000 IPK, Germany	Sequel2 Wisconsin, US	14.0419	37.8923
Hordeum comosum	NGB18417	Argentina	Young leaf	IPK Gatersleben, Germany	Novaseq6000 IPK, Germany	Sequel2 Wisconsin,US	30.3699	26.4386
Hordeum cordobense	BCC 2067	Argentina	Young leaf	IPK Gatersleben, Germany	Novaseq6000 IPK, Germany	Sequel2 Wisconsin, US	11.4543	37.9675
Hordeum erectifolium	BCC 2026 = NGB6816	Argentina	Young leaf	Duesseldorf, Germany	Novaseq6000 IPK, Germany	Sequel2 Duesseldorf, Germany	17.9526	33.6931
Hordeum euclaston	NGB90233	Uruguay	Young leaf	Duesseldorf, Germany	Novaseq6000 IPK, Germany	Sequel2 Duesseldorf, Germany	24.377	34.3161
Hordeum flexuosum	BCC 2023	Argentina	Young leaf	IPK Gatersleben, Germany	Novaseq6000 IPK, Germany	Sequel2 Wisconsin, US	29.682	23.459
Hordeum gussoneanum	BCC 2005	Spain	Young leaf	Beijing, China	Novaseq6000 IPK, Germany	Sequel2 Novogene, China	19.0586	27.9772
Hordeum intercedens	BCC 2059 = NGB15676	Mexico	Young leaf	Duesseldorf, Germany	Novaseq6000 IPK, Germany	Sequel2 Duesseldorf, Germany	24.6615	34.0796
Hordeum jubatum	BCC 2055	USA	Young leaf	IPK Gatersleben, Germany	Novaseq6000 IPK, Germany	Sequel2 Wisconsin, US	12.5963	34.7066
Hordeum marinum	BCC 2001	Greece	Young leaf	Beijing, China	Novaseq6000 Novogene, China	Sequel2 Novogene, China	24.8653	23.081
Hordeum murinum	BCC 2017	Tadzhikistan	Young leaf	IPK Gatersleben, Germany	Novaseq6000 IPK, Germany	Sequel2 Wisconsin, US	14.7749	24.6216
Hordeum murinum	BCC 2009	Denmark	Young leaf	Duesseldorf, Germany	Novaseq6000 IPK, Germany	Sequel2 Duesseldorf, Germany	28.7426	24.1303
Hordeum muticum	NGB90062	Bolivia	Young leaf	IPK Gatersleben, Germany	Novaseq6000 IPK, Germany	Sequel2 Wisconsin, US	12.8634	34.0091
Hordeum patagonicum	BCC 2065	Argentina	Young leaf	IPK Gatersleben, Germany	Novaseq6000 IPK, Germany	Sequel2 Wisconsin, US	28.6518	27.3938
Hordeum pubiflorum	BCC 2028	Argentina	Young leaf	IPK Gatersleben, Germany	Novaseq6000 IPK, Germany	Sequel2 Wisconsin, US	29.7214	23.4222
Hordeum pusillum	BCC 2043 = NGB6888	USA	Young leaf	Duesseldorf, Germany	Novaseq6000 IPK, Germany	Sequel2 Duesseldorf, Germany	25.5414	22.124
Hordeum roshevitzii	BCC 2069	China	Young leaf	Beijing, China	Novaseq6000 IPK, Germany	Sequel2 Berry Genomics, China	26.1788	32.6283
Hordeum secalinum	BCC 2004	Spain	Young leaf	IPK Gatersleben, Germany	Novaseq6000 IPK, Germany	Sequel2 Wisconsin, US	22.2003	29.9332
Hordeum stenostachys	BCC 2041 = NGB90152	Argentina	Young leaf	Duesseldorf, Germany	Novaseq6000 IPK, Germany	Sequel2 Duesseldorf, Germany	15.7702	33.972

## Sheet: 3
Summary of genome assembly evaluation.
Number	Species	Ploidy	Accession Number	BUSCO (Poales odb10)	LAI	Base pair QV	k-mer completeness(%)
1	Hordeum vulgare	Diploid	Morex	0.978	18.4	57.3484	97.4216
2	Hordeum bogdanii	Diploid	H240	0.982	16.93	69.1401	98.0506
3	Hordeum brevisubulatum	Diploid	PI401390	0.981	21.57	68.0356	78.8322
4	Hordeum bulbosum	Diploid	FB19-011-3	0.983	17.82	66.1725	95.1398
5	Hordeum californicum	Diploid	BCC2058	0.98	15.9	69.246	98.197
6	Hordeum chilense	Diploid	GRA1000	0.981	14.83	74.5941	98.4014
7	Hordeum comosum	Diploid	NGB18417	0.984	17.21	67.8867	97.5906
8	Hordeum cordobense	Diploid	BCC2067	0.979	12.99	74.0905	98.7445
9	Hordeum erectifolium	Diploid	NGB6816	0.972	16.39	65.9585	97.7949
10	Hordeum euclaston	Diploid	NGB90233	0.981	12.16	68.0973	99.1847
11	Hordeum flexuosum	Diploid	BCC2023	0.982	15.08	71.3738	98.7523
12	Hordeum gussoneanum	Diploid	BCC2005	0.981	13.66	69.073	98.4083
13	Hordeum intercedens	Diploid	NGB15676	0.981	12.72	67.1664	99.2649
14	Hordeum jubatum	Tetraploid	BCC2055	0.987	15.28	72.517	98.2333
15	Hordeum marinum	Diploid	BCC2001	0.98	11.64	69.4453	98.5112
16	Hordeum murinum	Tetraploid	BCC2009	0.989	11.2	66.8466	99.0095
17	Hordeum murinum	Diploid	BCC2017	0.978	11.94	49.3843	92.83
18	Hordeum muticum	Diploid	NGB90062	0.982	13.95	75.0604	98.3831
19	Hordeum patagonicum	Diploid	BCC2065	0.983	16.49	67.1839	97.6017
20	Hordeum pubiflorum	Diploid	BCC2028	0.981	14.94	69.7316	98.0942
21	Hordeum pusillum	Diploid	NGB6888	0.982	11.5	67.7217	98.5302
22	Hordeum roshevitzii	Diploid	BCC2069	0.981	16.19	65.4442	97.1788
23	Hordeum secalinum	Tetraploid	BCC2004	0.989	13.45	68.4352	97.9524
24	Hordeum stenostachys	Diploid	NGB90152	0.981	15.38	69.9182	98.0261
25	Hordeum marinum	Diploid	H559	0.978	13.14	48.2628	97.4867

## Sheet: 4
Summary statistics and accession codes of RNA-Seq and Iso-Seq data.
species	sample	Type	ploidy	Tissue	developmental stage OR age	collection date, format: 2000-10-10	country of origin	Tissue_place	Sequencing
Hordeum erectifolium	BCC 2026 = NGB6816	RNAseq	Diploid	germinating_seed_morning, ZT 1-3		2022-04 to 2022-06	Argentina	Duesseldorf, Germany	NovaSeq 6000,Novogene
Hordeum erectifolium	BCC 2026 = NGB6816	RNAseq	Diploid	8_day_roots_morning, ZT 1-3		2022-04 to 2022-06	Argentina	Duesseldorf, Germany	NovaSeq 6000,Novogene
Hordeum erectifolium	BCC 2026 = NGB6816	RNAseq	Diploid	8_day_shoot_morning, ZT 1-3		2022-04 to 2022-06	Argentina	Duesseldorf, Germany	NovaSeq 6000,Novogene
Hordeum erectifolium	BCC 2026 = NGB6816	RNAseq	Diploid	8_day_etiolated_shoot_morning, ZT 1-3		2022-04 to 2022-06	Argentina	Duesseldorf, Germany	NovaSeq 6000,Novogene
Hordeum erectifolium	BCC 2026 = NGB6816	RNAseq	Diploid	8_day_roots_evening, ZT 13-15		2022-04 to 2022-06	Argentina	Duesseldorf, Germany	NovaSeq 6000,Novogene
Hordeum erectifolium	BCC 2026 = NGB6816	RNAseq	Diploid	8_day_shoot_evening, ZT 13-15		2022-04 to 2022-06	Argentina	Duesseldorf, Germany	NovaSeq 6000,Novogene
Hordeum erectifolium	BCC 2026 = NGB6816	RNAseq	Diploid	8_day_etiolated_shoot_evening, ZT 13-15		2022-04 to 2022-06	Argentina	Duesseldorf, Germany	NovaSeq 6000,Novogene
Hordeum erectifolium	BCC 2026 = NGB6816	RNAseq	Diploid	W3-6_evening, ZT 13-15		2022-04 to 2022-06	Argentina	Duesseldorf, Germany	NovaSeq 6000,Novogene
Hordeum erectifolium	BCC 2026 = NGB6816	RNAseq	Diploid	W9-10_evening, ZT 13-15		2022-04 to 2022-06	Argentina	Duesseldorf, Germany	NovaSeq 6000,Novogene
Hordeum erectifolium	BCC 2026 = NGB6816	RNAseq	Diploid	peduncle_evening, ZT 13-15		2022-04 to 2022-06	Argentina	Duesseldorf, Germany	NovaSeq 6000,Novogene
Hordeum erectifolium	BCC 2026 = NGB6816	RNAseq	Diploid	flagleaf_evening, ZT 13-15		2022-04 to 2022-06	Argentina	Duesseldorf, Germany	NovaSeq 6000,Novogene
Hordeum erectifolium	BCC 2026 = NGB6816	RNAseq	Diploid	sene_leaf_evening, ZT 13-15		2022-04 to 2022-06	Argentina	Duesseldorf, Germany	NovaSeq 6000,Novogene
Hordeum erectifolium	BCC 2026 = NGB6816	RNAseq	Diploid	caryops_10DPA_evening, ZT 13-15		2022-04 to 2022-06	Argentina	Duesseldorf, Germany	NovaSeq 6000,Novogene
Hordeum stenostachys	BCC 2041 = NGB90152	RNAseq	Diploid	germinating_seed_morning, ZT 1-3		2022-04 to 2022-06	Argentina	Duesseldorf, Germany	NovaSeq 6000,Novogene
Hordeum stenostachys	BCC 2041 = NGB90152	RNAseq	Diploid	8_day_roots_morning, ZT 1-3		2022-04 to 2022-06	Argentina	Duesseldorf, Germany	NovaSeq 6000,Novogene
Hordeum stenostachys	BCC 2041 = NGB90152	RNAseq	Diploid	8_day_shoot_morning, ZT 1-3		2022-04 to 2022-06	Argentina	Duesseldorf, Germany	NovaSeq 6000,Novogene
Hordeum stenostachys	BCC 2041 = NGB90152	RNAseq	Diploid	8_day_etiolated_shoot_morning, ZT 1-3		2022-04 to 2022-06	Argentina	Duesseldorf, Germany	NovaSeq 6000,Novogene
Hordeum stenostachys	BCC 2041 = NGB90152	RNAseq	Diploid	8_day_roots_evening, ZT 13-15		2022-04 to 2022-06	Argentina	Duesseldorf, Germany	NovaSeq 6000,Novogene
Hordeum stenostachys	BCC 2041 = NGB90152	RNAseq	Diploid	8_day_shoot_evening, ZT 13-15		2022-04 to 2022-06	Argentina	Duesseldorf, Germany	NovaSeq 6000,Novogene
Hordeum stenostachys	BCC 2041 = NGB90152	RNAseq	Diploid	8_day_etiolated_shoot_evening, ZT 13-15		2022-04 to 2022-06	Argentina	Duesseldorf, Germany	NovaSeq 6000,Novogene
Hordeum stenostachys	BCC 2041 = NGB90152	RNAseq	Diploid	W3-6_evening, ZT 13-15		2022-04 to 2022-06	Argentina	Duesseldorf, Germany	NovaSeq 6000,Novogene
Hordeum stenostachys	BCC 2041 = NGB90152	RNAseq	Diploid	W9-10_evening, ZT 13-15		2022-04 to 2022-06	Argentina	Duesseldorf, Germany	NovaSeq 6000,Novogene
Hordeum stenostachys	BCC 2041 = NGB90152	RNAseq	Diploid	peduncle_evening, ZT 13-15		2022-04 to 2022-06	Argentina	Duesseldorf, Germany	NovaSeq 6000,Novogene
Hordeum stenostachys	BCC 2041 = NGB90152	RNAseq	Diploid	flagleaf_evening, ZT 13-15		2022-04 to 2022-06	Argentina	Duesseldorf, Germany	NovaSeq 6000,Novogene
Hordeum stenostachys	BCC 2041 = NGB90152	RNAseq	Diploid	sene_leaf_evening, ZT 13-15		2022-04 to 2022-06	Argentina	Duesseldorf, Germany	NovaSeq 6000,Novogene
Hordeum stenostachys	BCC 2041 = NGB90152	RNAseq	Diploid	caryops_10DPA_evening, ZT 13-15		2022-04 to 2022-06	Argentina	Duesseldorf, Germany	NovaSeq 6000,Novogene
Hordeum pusillum	BCC 2043 = NGB6888	RNAseq	Diploid	germinating_seed_morning, ZT 1-3		2022-04 to 2022-06	USA	Duesseldorf, Germany	NovaSeq 6000,Novogene
Hordeum pusillum	BCC 2043 = NGB6888	RNAseq	Diploid	8_day_roots_morning, ZT 1-3		2022-04 to 2022-06	USA	Duesseldorf, Germany	NovaSeq 6000,Novogene
Hordeum pusillum	BCC 2043 = NGB6888	RNAseq	Diploid	8_day_shoot_morning, ZT 1-3		2022-04 to 2022-06	USA	Duesseldorf, Germany	NovaSeq 6000,Novogene
Hordeum pusillum	BCC 2043 = NGB6888	RNAseq	Diploid	8_day_etiolated_shoot_morning, ZT 1-3		2022-04 to 2022-06	USA	Duesseldorf, Germany	NovaSeq 6000,Novogene
Hordeum pusillum	BCC 2043 = NGB6888	RNAseq	Diploid	8_day_roots_evening, ZT 13-15		2022-04 to 2022-06	USA	Duesseldorf, Germany	NovaSeq 6000,Novogene
Hordeum pusillum	BCC 2043 = NGB6888	RNAseq	Diploid	8_day_shoot_evening, ZT 13-15		2022-04 to 2022-06	USA	Duesseldorf, Germany	NovaSeq 6000,Novogene
Hordeum pusillum	BCC 2043 = NGB6888	RNAseq	Diploid	8_day_etiolated_shoot_evening, ZT 13-15		2022-04 to 2022-06	USA	Duesseldorf, Germany	NovaSeq 6000,Novogene
Hordeum pusillum	BCC 2043 = NGB6888	RNAseq	Diploid	W3-6_evening, ZT 13-15		2022-04 to 2022-06	USA	Duesseldorf, Germany	NovaSeq 6000,Novogene
Hordeum pusillum	BCC 2043 = NGB6888	RNAseq	Diploid	W9-10_evening, ZT 13-15		2022-04 to 2022-06	USA	Duesseldorf, Germany	NovaSeq 6000,Novogene
Hordeum pusillum	BCC 2043 = NGB6888	RNAseq	Diploid	peduncle_evening, ZT 13-15		2022-04 to 2022-06	USA	Duesseldorf, Germany	NovaSeq 6000,Novogene
Hordeum pusillum	BCC 2043 = NGB6888	RNAseq	Diploid	flagleaf_evening, ZT 13-15		2022-04 to 2022-06	USA	Duesseldorf, Germany	NovaSeq 6000,Novogene
Hordeum pusillum	BCC 2043 = NGB6888	RNAseq	Diploid	sene_leaf_evening, ZT 13-15		2022-04 to 2022-06	USA	Duesseldorf, Germany	NovaSeq 6000,Novogene
Hordeum pusillum	BCC 2043 = NGB6888	RNAseq	Diploid	caryops_10DPA_evening, ZT 13-15		2022-04 to 2022-06	USA	Duesseldorf, Germany	NovaSeq 6000,Novogene
Hordeum intercedens	BCC 2059 = NGB15676	RNAseq	Diploid	germinating_seed_morning, ZT 1-3		2022-04 to 2022-06	Mexico	Duesseldorf, Germany	NovaSeq 6000,Novogene
Hordeum intercedens	BCC 2059 = NGB15676	RNAseq	Diploid	8_day_roots_morning, ZT 1-3		2022-04 to 2022-06	Mexico	Duesseldorf, Germany	NovaSeq 6000,Novogene
Hordeum intercedens	BCC 2059 = NGB15676	RNAseq	Diploid	8_day_shoot_morning, ZT 1-3		2022-04 to 2022-06	Mexico	Duesseldorf, Germany	NovaSeq 6000,Novogene
Hordeum intercedens	BCC 2059 = NGB15676	RNAseq	Diploid	8_day_etiolated_shoot_morning, ZT 1-3		2022-04 to 2022-06	Mexico	Duesseldorf, Germany	NovaSeq 6000,Novogene
Hordeum intercedens	BCC 2059 = NGB15676	RNAseq	Diploid	8_day_roots_evening, ZT 13-15		2022-04 to 2022-06	Mexico	Duesseldorf, Germany	NovaSeq 6000,Novogene
Hordeum intercedens	BCC 2059 = NGB15676	RNAseq	Diploid	8_day_shoot_evening, ZT 13-15		2022-04 to 2022-06	Mexico	Duesseldorf, Germany	NovaSeq 6000,Novogene
Hordeum intercedens	BCC 2059 = NGB15676	RNAseq	Diploid	8_day_etiolated_shoot_evening, ZT 13-15		2022-04 to 2022-06	Mexico	Duesseldorf, Germany	NovaSeq 6000,Novogene
Hordeum intercedens	BCC 2059 = NGB15676	RNAseq	Diploid	W3-6_evening, ZT 13-15		2022-04 to 2022-06	Mexico	Duesseldorf, Germany	NovaSeq 6000,Novogene
Hordeum intercedens	BCC 2059 = NGB15676	RNAseq	Diploid	W9-10_evening, ZT 13-15		2022-04 to 2022-06	Mexico	Duesseldorf, Germany	NovaSeq 6000,Novogene
Hordeum intercedens	BCC 2059 = NGB15676	RNAseq	Diploid	peduncle_evening, ZT 13-15		2022-04 to 2022-06	Mexico	Duesseldorf, Germany	NovaSeq 6000,Novogene
Hordeum intercedens	BCC 2059 = NGB15676	RNAseq	Diploid	flagleaf_evening, ZT 13-15		2022-04 to 2022-06	Mexico	Duesseldorf, Germany	NovaSeq 6000,Novogene
Hordeum intercedens	BCC 2059 = NGB15676	RNAseq	Diploid	sene_leaf_evening, ZT 13-15		2022-04 to 2022-06	Mexico	Duesseldorf, Germany	NovaSeq 6000,Novogene
Hordeum intercedens	BCC 2059 = NGB15676	RNAseq	Diploid	caryops_10DPA_evening, ZT 13-15		2022-04 to 2022-06	Mexico	Duesseldorf, Germany	NovaSeq 6000,Novogene
Hordeum euclaston	NGB90233	RNAseq	Diploid	germinating_seed_morning, ZT 1-3		2022-04 to 2022-06	Uruguay	Duesseldorf, Germany	NovaSeq 6000,Novogene
Hordeum euclaston	NGB90233	RNAseq	Diploid	8_day_roots_morning, ZT 1-3		2022-04 to 2022-06	Uruguay	Duesseldorf, Germany	NovaSeq 6000,Novogene
Hordeum euclaston	NGB90233	RNAseq	Diploid	8_day_shoot_morning, ZT 1-3		2022-04 to 2022-06	Uruguay	Duesseldorf, Germany	NovaSeq 6000,Novogene
Hordeum euclaston	NGB90233	RNAseq	Diploid	8_day_etiolated_shoot_morning, ZT 1-3		2022-04 to 2022-06	Uruguay	Duesseldorf, Germany	NovaSeq 6000,Novogene
Hordeum euclaston	NGB90233	RNAseq	Diploid	8_day_roots_evening, ZT 13-15		2022-04 to 2022-06	Uruguay	Duesseldorf, Germany	NovaSeq 6000,Novogene
Hordeum euclaston	NGB90233	RNAseq	Diploid	8_day_shoot_evening, ZT 13-15		2022-04 to 2022-06	Uruguay	Duesseldorf, Germany	NovaSeq 6000,Novogene
Hordeum euclaston	NGB90233	RNAseq	Diploid	8_day_etiolated_shoot_evening, ZT 13-15		2022-04 to 2022-06	Uruguay	Duesseldorf, Germany	NovaSeq 6000,Novogene
Hordeum euclaston	NGB90233	RNAseq	Diploid	W3-6_evening, ZT 13-15		2022-04 to 2022-06	Uruguay	Duesseldorf, Germany	NovaSeq 6000,Novogene
Hordeum euclaston	NGB90233	RNAseq	Diploid	W9-10_evening, ZT 13-15		2022-04 to 2022-06	Uruguay	Duesseldorf, Germany	NovaSeq 6000,Novogene
Hordeum euclaston	NGB90233	RNAseq	Diploid	peduncle_evening, ZT 13-15		2022-04 to 2022-06	Uruguay	Duesseldorf, Germany	NovaSeq 6000,Novogene
Hordeum euclaston	NGB90233	RNAseq	Diploid	flagleaf_evening, ZT 13-15		2022-04 to 2022-06	Uruguay	Duesseldorf, Germany	NovaSeq 6000,Novogene
Hordeum euclaston	NGB90233	RNAseq	Diploid	sene_leaf_evening, ZT 13-15		2022-04 to 2022-06	Uruguay	Duesseldorf, Germany	NovaSeq 6000,Novogene
Hordeum euclaston	NGB90233	RNAseq	Diploid	caryops_10DPA_evening, ZT 13-15		2022-04 to 2022-06	Uruguay	Duesseldorf, Germany	NovaSeq 6000,Novogene
Hordeum murinum murinum	BCC 2009	RNAseq	Tetraploid	germinating_seed_morning, ZT 1-3		2022-04 to 2022-06	Denmark	Duesseldorf, Germany	NovaSeq 6000,Novogene
Hordeum murinum murinum	BCC 2009	RNAseq	Tetraploid	8_day_roots_morning, ZT 1-3		2022-04 to 2022-06	Denmark	Duesseldorf, Germany	NovaSeq 6000,Novogene
Hordeum murinum murinum	BCC 2009	RNAseq	Tetraploid	8_day_shoot_morning, ZT 1-3		2022-04 to 2022-06	Denmark	Duesseldorf, Germany	NovaSeq 6000,Novogene
Hordeum murinum murinum	BCC 2009	RNAseq	Tetraploid	8_day_etiolated_shoot_morning, ZT 1-3		2022-04 to 2022-06	Denmark	Duesseldorf, Germany	NovaSeq 6000,Novogene
Hordeum murinum murinum	BCC 2009	RNAseq	Tetraploid	8_day_roots_evening, ZT 13-15		2022-04 to 2022-06	Denmark	Duesseldorf, Germany	NovaSeq 6000,Novogene
Hordeum murinum murinum	BCC 2009	RNAseq	Tetraploid	8_day_shoot_evening, ZT 13-15		2022-04 to 2022-06	Denmark	Duesseldorf, Germany	NovaSeq 6000,Novogene
Hordeum murinum murinum	BCC 2009	RNAseq	Tetraploid	8_day_etiolated_shoot_evening, ZT 13-15		2022-04 to 2022-06	Denmark	Duesseldorf, Germany	NovaSeq 6000,Novogene
Hordeum murinum murinum	BCC 2009	RNAseq	Tetraploid	W3-6_evening, ZT 13-15		2022-04 to 2022-06	Denmark	Duesseldorf, Germany	NovaSeq 6000,Novogene
Hordeum murinum murinum	BCC 2009	RNAseq	Tetraploid	W9-10_evening, ZT 13-15		2022-04 to 2022-06	Denmark	Duesseldorf, Germany	NovaSeq 6000,Novogene
Hordeum murinum murinum	BCC 2009	RNAseq	Tetraploid	peduncle_evening, ZT 13-15		2022-04 to 2022-06	Denmark	Duesseldorf, Germany	NovaSeq 6000,Novogene
Hordeum murinum murinum	BCC 2009	RNAseq	Tetraploid	flagleaf_evening, ZT 13-15		2022-04 to 2022-06	Denmark	Duesseldorf, Germany	NovaSeq 6000,Novogene
Hordeum murinum murinum	BCC 2009	RNAseq	Tetraploid	sene_leaf_evening, ZT 13-15		2022-04 to 2022-06	Denmark	Duesseldorf, Germany	NovaSeq 6000,Novogene
Hordeum murinum murinum	BCC 2009	RNAseq	Tetraploid	caryops_10DPA_evening, ZT 13-15		2022-04 to 2022-06	Denmark	Duesseldorf, Germany	NovaSeq 6000,Novogene
Hordeum murinum murinum	BCC 2009	RNAseq	Tetraploid	germinating_seed_morning, ZT 1-3		2022-04 to 2022-06	Denmark	Duesseldorf, Germany	NovaSeq 6000,Novogene
Hordeum murinum murinum	BCC 2009	RNAseq	Tetraploid	8_day_roots_morning, ZT 1-3		2022-04 to 2022-06	Denmark	Duesseldorf, Germany	NovaSeq 6000,Novogene
Hordeum murinum murinum	BCC 2009	RNAseq	Tetraploid	8_day_shoot_morning, ZT 1-3		2022-04 to 2022-06	Denmark	Duesseldorf, Germany	NovaSeq 6000,Novogene
Hordeum murinum murinum	BCC 2009	RNAseq	Tetraploid	8_day_etiolated_shoot_morning, ZT 1-3		2022-04 to 2022-06	Denmark	Duesseldorf, Germany	NovaSeq 6000,Novogene
Hordeum murinum murinum	BCC 2009	RNAseq	Tetraploid	8_day_roots_evening, ZT 13-15		2022-04 to 2022-06	Denmark	Duesseldorf, Germany	NovaSeq 6000,Novogene
Hordeum murinum murinum	BCC 2009	RNAseq	Tetraploid	8_day_shoot_evening, ZT 13-15		2022-04 to 2022-06	Denmark	Duesseldorf, Germany	NovaSeq 6000,Novogene
Hordeum murinum murinum	BCC 2009	RNAseq	Tetraploid	8_day_etiolated_shoot_evening, ZT 13-15		2022-04 to 2022-06	Denmark	Duesseldorf, Germany	NovaSeq 6000,Novogene
Hordeum murinum murinum	BCC 2009	RNAseq	Tetraploid	W3-6_evening, ZT 13-15		2022-04 to 2022-06	Denmark	Duesseldorf, Germany	NovaSeq 6000,Novogene
Hordeum murinum murinum	BCC 2009	RNAseq	Tetraploid	W9-10_evening, ZT 13-15		2022-04 to 2022-06	Denmark	Duesseldorf, Germany	NovaSeq 6000,Novogene
Hordeum murinum murinum	BCC 2009	RNAseq	Tetraploid	peduncle_evening, ZT 13-15		2022-04 to 2022-06	Denmark	Duesseldorf, Germany	NovaSeq 6000,Novogene
Hordeum murinum murinum	BCC 2009	RNAseq	Tetraploid	flagleaf_evening, ZT 13-15		2022-04 to 2022-06	Denmark	Duesseldorf, Germany	NovaSeq 6000,Novogene
Hordeum murinum murinum	BCC 2009	RNAseq	Tetraploid	sene_leaf_evening, ZT 13-15		2022-04 to 2022-06	Denmark	Duesseldorf, Germany	NovaSeq 6000,Novogene
Hordeum murinum murinum	BCC 2009	RNAseq	Tetraploid	caryops_10DPA_evening, ZT 13-15		2022-04 to 2022-06	Denmark	Duesseldorf, Germany	NovaSeq 6000,Novogene
Hordeum bogdanii	H 240	RNAseq	Diploid	flag leaf	1st year,heading	2022-06-07	Afghanistan	Tottori, Japan	illumina NextSeq 500
Hordeum bogdanii	H 240	RNAseq	Diploid	flag leaf	1st year,heading	2022-06-07	Afghanistan	Tottori, Japan	illumina NextSeq 500
Hordeum bogdanii	H 240	RNAseq	Diploid	flag leaf	1st year,heading	2022-06-07	Afghanistan	Tottori, Japan	illumina NextSeq 500
Hordeum bogdanii	H 240	RNAseq	Diploid	stem	1st year,heading	2022-06-07	Afghanistan	Tottori, Japan	illumina NextSeq 500
Hordeum bogdanii	H 240	RNAseq	Diploid	stem	1st year,heading	2022-06-07	Afghanistan	Tottori, Japan	illumina NextSeq 500
Hordeum bogdanii	H 240	RNAseq	Diploid	stem	1st year,heading	2022-06-07	Afghanistan	Tottori, Japan	illumina NextSeq 500
Hordeum bogdanii	H 240	RNAseq	Diploid	spike middle part	1st year,anthesis	2022-06-07	Afghanistan	Tottori, Japan	illumina NextSeq 500
Hordeum bogdanii	H 240	RNAseq	Diploid	spike middle part	1st year,anthesis	2022-06-07	Afghanistan	Tottori, Japan	illumina NextSeq 500
Hordeum bogdanii	H 240	RNAseq	Diploid	spike middle part	1st year,anthesis	2022-06-07	Afghanistan	Tottori, Japan	illumina NextSeq 500
Hordeum bogdanii	H 240	RNAseq	Diploid	central spikelets	1st year,anthesis	2022-06-07	Afghanistan	Tottori, Japan	illumina NextSeq 500
Hordeum bogdanii	H 240	RNAseq	Diploid	central spikelets	1st year,anthesis	2022-06-07	Afghanistan	Tottori, Japan	illumina NextSeq 500
Hordeum bogdanii	H 240	RNAseq	Diploid	central spikelets	1st year,anthesis	2022-06-07	Afghanistan	Tottori, Japan	illumina NextSeq 500
Hordeum bogdanii	H 240	RNAseq	Diploid	lateral spikelets	1st year,anthesis	2022-06-07	Afghanistan	Tottori, Japan	illumina NextSeq 500
Hordeum bogdanii	H 240	RNAseq	Diploid	lateral spikelets	1st year,anthesis	2022-06-07	Afghanistan	Tottori, Japan	illumina NextSeq 500
Hordeum bogdanii	H 240	RNAseq	Diploid	lateral spikelets	1st year,anthesis	2022-06-07	Afghanistan	Tottori, Japan	illumina NextSeq 500
Hordeum bogdanii	H 240	RNAseq	Diploid	immature spikes	1st year,green anther stage	2022-06-07	Afghanistan	Tottori, Japan	illumina NextSeq 500
Hordeum bogdanii	H 240	RNAseq	Diploid	immature spikes	1st year,green anther stage	2022-06-07	Afghanistan	Tottori, Japan	illumina NextSeq 500
Hordeum bogdanii	H 240	RNAseq	Diploid	immature spikes	1st year,green anther stage	2022-06-07	Afghanistan	Tottori, Japan	illumina NextSeq 500
Hordeum bogdanii	H 240	RNAseq	Diploid	immature spikes	1st year,white anther stage	2022-06-07	Afghanistan	Tottori, Japan	illumina NextSeq 500
Hordeum bogdanii	H 240	RNAseq	Diploid	immature spikes	1st year,white anther stage	2022-06-07	Afghanistan	Tottori, Japan	illumina NextSeq 500
Hordeum bogdanii	H 240	RNAseq	Diploid	immature spikes	1st year,white anther stage	2022-06-28	Afghanistan	Tottori, Japan	illumina NextSeq 500
Hordeum bogdanii	H 240	RNAseq	Diploid	immature spikes	1st year,awn primordium stage	2022-06-07	Afghanistan	Tottori, Japan	illumina NextSeq 500
Hordeum bogdanii	H 240	RNAseq	Diploid	immature spikes	1st year,lemma primordium stage	2022-06-07	Afghanistan	Tottori, Japan	illumina NextSeq 500
Hordeum bogdanii	H 240	RNAseq	Diploid	shoots	1st year,14 days after germination	2022-06-13	Afghanistan	Tottori, Japan	illumina NextSeq 500
Hordeum bogdanii	H 240	RNAseq	Diploid	shoots	1st year,14 days after germination	2022-06-13	Afghanistan	Tottori, Japan	illumina NextSeq 500
Hordeum bogdanii	H 240	RNAseq	Diploid	shoots	1st year,14 days after germination	2022-06-13	Afghanistan	Tottori, Japan	illumina NextSeq 500
Hordeum bogdanii	H 240	RNAseq	Diploid	roots	1st year,14 days after germination	2022-06-13	Afghanistan	Tottori, Japan	illumina NextSeq 500
Hordeum bogdanii	H 240	RNAseq	Diploid	roots	1st year,14 days after germination	2022-06-13	Afghanistan	Tottori, Japan	illumina NextSeq 500
Hordeum bogdanii	H 240	RNAseq	Diploid	roots	1st year,14 days after germination	2022-06-13	Afghanistan	Tottori, Japan	illumina NextSeq 500
Hordeum bogdanii	H 240	RNAseq	Diploid	flag leaf	2nd year,heading	2022-06-28	Afghanistan	Tottori, Japan	illumina NextSeq 500
Hordeum bogdanii	H 240	RNAseq	Diploid	flag leaf	2nd year,heading	2022-06-28	Afghanistan	Tottori, Japan	illumina NextSeq 500
Hordeum bogdanii	H 240	RNAseq	Diploid	flag leaf	2nd year,heading	2022-06-28	Afghanistan	Tottori, Japan	illumina NextSeq 500
Hordeum bogdanii	H 240	RNAseq	Diploid	stem	2nd year,heading	2022-06-28	Afghanistan	Tottori, Japan	illumina NextSeq 500
Hordeum bogdanii	H 240	RNAseq	Diploid	stem	2nd year,heading	2022-06-28	Afghanistan	Tottori, Japan	illumina NextSeq 500
Hordeum bogdanii	H 240	RNAseq	Diploid	stem	2nd year,heading	2022-06-28	Afghanistan	Tottori, Japan	illumina NextSeq 500
Hordeum bogdanii	H 240	RNAseq	Diploid	spike middle part	2nd year,anthesis	2022-06-28	Afghanistan	Tottori, Japan	illumina NextSeq 500
Hordeum bogdanii	H 240	RNAseq	Diploid	spike middle part	2nd year,anthesis	2022-06-28	Afghanistan	Tottori, Japan	illumina NextSeq 500
Hordeum bogdanii	H 240	RNAseq	Diploid	spike middle part	2nd year,anthesis	2022-06-28	Afghanistan	Tottori, Japan	illumina NextSeq 500
Hordeum bogdanii	H 240	RNAseq	Diploid	central spikelets	2nd year,anthesis	2022-06-28	Afghanistan	Tottori, Japan	illumina NextSeq 500
Hordeum bogdanii	H 240	RNAseq	Diploid	central spikelets	2nd year,anthesis	2022-06-28	Afghanistan	Tottori, Japan	illumina NextSeq 500
Hordeum bogdanii	H 240	RNAseq	Diploid	central spikelets	2nd year,anthesis	2022-06-28	Afghanistan	Tottori, Japan	illumina NextSeq 500
Hordeum bogdanii	H 240	RNAseq	Diploid	lateral spikelets	2nd year,anthesis	2022-06-28	Afghanistan	Tottori, Japan	illumina NextSeq 500
Hordeum bogdanii	H 240	RNAseq	Diploid	lateral spikelets	2nd year,anthesis	2022-06-28	Afghanistan	Tottori, Japan	illumina NextSeq 500
Hordeum bogdanii	H 240	RNAseq	Diploid	lateral spikelets	2nd year,anthesis	2022-06-28	Afghanistan	Tottori, Japan	illumina NextSeq 500
Hordeum bogdanii	H 240	RNAseq	Diploid	immature spikes	2nd year,green anther stage	2022-06-28	Afghanistan	Tottori, Japan	illumina NextSeq 500
Hordeum bogdanii	H 240	RNAseq	Diploid	immature spikes	2nd year,green anther stage	2022-06-28	Afghanistan	Tottori, Japan	illumina NextSeq 500
Hordeum bogdanii	H 240	RNAseq	Diploid	immature spikes	2nd year,green anther stage	2022-06-28	Afghanistan	Tottori, Japan	illumina NextSeq 500
Hordeum bogdanii	H 240	RNAseq	Diploid	immature spikes	2nd year,white anther stage	2022-06-28	Afghanistan	Tottori, Japan	illumina NextSeq 500
Hordeum bogdanii	H 240	RNAseq	Diploid	immature spikes	2nd year,white anther stage	2022-06-28	Afghanistan	Tottori, Japan	illumina NextSeq 500
Hordeum bogdanii	H 240	RNAseq	Diploid	immature spikes	2nd year,white anther stage	2022-06-28	Afghanistan	Tottori, Japan	illumina NextSeq 500
Hordeum bogdanii	H 240	RNAseq	Diploid	immature spikes	2nd year,awn primordium stage	2022-06-28	Afghanistan	Tottori, Japan	illumina NextSeq 500
Hordeum marinum	BCC 2001	RNAseq	Diploid	Young flowering spike			Greece	IPK Gatersleben, Germany	Novaseq6000 IPK, Germany
Hordeum marinum	BCC 2001	RNAseq	Diploid	Leaf (plus a bit stalk)			Greece	IPK Gatersleben, Germany	Novaseq6000 IPK, Germany
Hordeum marinum	BCC 2001	RNAseq	Diploid	Root			Greece	IPK Gatersleben, Germany	Novaseq6000 IPK, Germany
Hordeum gussoneanum	BCC 2005	RNAseq	Diploid	Young flowering spike			Spain	IPK Gatersleben, Germany	Novaseq6000 IPK, Germany
Hordeum gussoneanum	BCC 2005	RNAseq	Diploid	Leaf (plus a bit stalk)			Spain	IPK Gatersleben, Germany	Novaseq6000 IPK, Germany
Hordeum gussoneanum	BCC 2005	RNAseq	Diploid	Root			Spain	IPK Gatersleben, Germany	Novaseq6000 IPK, Germany
Hordeum secalinum	BCC 2004	RNAseq	Tetraploid	Young flowering spike			Spain	IPK Gatersleben, Germany	Novaseq6000 IPK, Germany
Hordeum secalinum	BCC 2004	RNAseq	Tetraploid	Leaf (plus a bit stalk)			Spain	IPK Gatersleben, Germany	Novaseq6000 IPK, Germany
Hordeum secalinum	BCC 2004	RNAseq	Tetraploid	Root			Spain	IPK Gatersleben, Germany	Novaseq6000 IPK, Germany
Hordeum californicum	BCC 2058	RNAseq	Diploid	Young flowering spike			USA	IPK Gatersleben, Germany	Novaseq6000 IPK, Germany
Hordeum californicum	BCC 2058	RNAseq	Diploid	Leaf (plus a bit stalk)			USA	IPK Gatersleben, Germany	Novaseq6000 IPK, Germany
Hordeum californicum	BCC 2058	RNAseq	Diploid	Root			USA	IPK Gatersleben, Germany	Novaseq6000 IPK, Germany
Hordeum flexuosum	BCC 2023	RNAseq	Diploid	Young flowering spike			Argentina	IPK Gatersleben, Germany	Novaseq6000 IPK, Germany
Hordeum flexuosum	BCC 2023	RNAseq	Diploid	Leaf (plus a bit stalk)			Argentina	IPK Gatersleben, Germany	Novaseq6000 IPK, Germany
Hordeum flexuosum	BCC 2023	RNAseq	Diploid	Root			Argentina	IPK Gatersleben, Germany	Novaseq6000 IPK, Germany
Hordeum muticum	NGB90062	RNAseq	Diploid	Young flowering spike			Bolivia	IPK Gatersleben, Germany	Novaseq6000 IPK, Germany
Hordeum muticum	NGB90062	RNAseq	Diploid	Leaf (plus a bit stalk)			Bolivia	IPK Gatersleben, Germany	Novaseq6000 IPK, Germany
Hordeum muticum	NGB90062	RNAseq	Diploid	Root			Bolivia	IPK Gatersleben, Germany	Novaseq6000 IPK, Germany
Hordeum jubatum	BCC 2055	RNAseq	Tetraploid	Young flowering spike			USA	IPK Gatersleben, Germany	Novaseq6000 IPK, Germany
Hordeum jubatum	BCC 2055	RNAseq	Tetraploid	Leaf (plus a bit stalk)			USA	IPK Gatersleben, Germany	Novaseq6000 IPK, Germany
Hordeum jubatum	BCC 2055	RNAseq	Tetraploid	Root			USA	IPK Gatersleben, Germany	Novaseq6000 IPK, Germany
Hordeum murinum	BCC 2017	RNAseq	Diploid	Young flowering spike			Tadzhikistan	IPK Gatersleben, Germany	Novaseq6000 IPK, Germany
Hordeum murinum	BCC 2017	RNAseq	Diploid	Leaf (plus a bit stalk)			Tadzhikistan	IPK Gatersleben, Germany	Novaseq6000 IPK, Germany
Hordeum murinum	BCC 2017	RNAseq	Diploid	Root			Tadzhikistan	IPK Gatersleben, Germany	Novaseq6000 IPK, Germany
Hordeum cordobense	BCC 2067	RNAseq	Diploid	Young flowering spike			Argentina	IPK Gatersleben, Germany	Novaseq6000 IPK, Germany
Hordeum cordobense	BCC 2067	RNAseq	Diploid	Leaf (plus a bit stalk)			Argentina	IPK Gatersleben, Germany	Novaseq6000 IPK, Germany
Hordeum cordobense	BCC 2067	RNAseq	Diploid	Root			Argentina	IPK Gatersleben, Germany	Novaseq6000 IPK, Germany
Hordeum chilense	GRA 1000	RNAseq	Diploid	Leaf (plus a bit stalk)			Unknown	IPK Gatersleben, Germany	Novaseq6000 IPK, Germany
Hordeum chilense	GRA 1000	RNAseq	Diploid	Root			Unknown	IPK Gatersleben, Germany	Novaseq6000 IPK, Germany
Hordeum comosum	NGB18417	RNAseq	Diploid	Leaf (plus a bit stalk)			Argentina	IPK Gatersleben, Germany	Novaseq6000 IPK, Germany
Hordeum comosum	NGB18417	RNAseq	Diploid	Root			Argentina	IPK Gatersleben, Germany	Novaseq6000 IPK, Germany
Hordeum patagonicum	BCC 2065	RNAseq	Diploid	Leaf (plus a bit stalk)			Argentina	IPK Gatersleben, Germany	Novaseq6000 IPK, Germany
Hordeum patagonicum	BCC 2065	RNAseq	Diploid	Root			Argentina	IPK Gatersleben, Germany	Novaseq6000 IPK, Germany
Hordeum pubiflorum	BCC 2028	RNAseq	Diploid	Leaf (plus a bit stalk)			Argentina	IPK Gatersleben, Germany	Novaseq6000 IPK, Germany
Hordeum pubiflorum	BCC 2028	RNAseq	Diploid	Root			Argentina	IPK Gatersleben, Germany	Novaseq6000 IPK, Germany
Hordeum brevisubulatum	PI401390	RNAseq	Diploid	Leaf			Iran	IPK Gatersleben, Germany	Novaseq6000 IPK, Germany
Hordeum brevisubulatum	PI401390	RNAseq	Diploid	Root			Iran	IPK Gatersleben, Germany	Novaseq6000 IPK, Germany
Hordeum roshevitzii	BCC 2069	RNAseq	Diploid	leaf	3-leaf stage	2022-03-25	China	Beijing, China	Novaseq6000, Novogene, China
Hordeum roshevitzii	BCC 2069	RNAseq	Diploid	root	3-leaf stage	2022-03-25	China	Beijing, China	Novaseq6000, Novogene, China
Hordeum roshevitzii	BCC 2069	RNAseq	Diploid	grain	germination stage	2022-03-25	China	Beijing, China	Novaseq6000, Novogene, China
Hordeum roshevitzii	BCC 2069	RNAseq	Diploid	young inflorescence	Waddington stage W5	2022-03-25	China	Beijing, China	Novaseq6000, Novogene, China
Hordeum roshevitzii	BCC 2069	RNAseq	Diploid	floret	Waddington stage W9	2022-03-25	China	Beijing, China	Novaseq6000, Novogene, China
Hordeum roshevitzii	BCC 2069	RNAseq	Diploid	rachis	Waddington stage W9	2022-03-25	China	Beijing, China	Novaseq6000, Novogene, China
Hordeum roshevitzii	BCC 2069	RNAseq	Diploid	caryopsis	5-10 days post anthesis	2022-03-25	China	Beijing, China	Novaseq6000, Novogene, China
Hordeum roshevitzii	BCC 2069	RNAseq	Diploid	senescing leaf	15 days post anthesis	2022-03-25	China	Beijing, China	Novaseq6000, Novogene, China
Hordeum bogdanii	H 240	Isoseq	Diploid	bulk RNA (mix RNA samples)	bulk RNA (mix RNA samples)	2022-06-07	Afghanistan	Tottori, Japan	Sequel Iie
Hordeum comosum	NGB18417	Isoseq	Diploid	bulk RNA (mix RNA samples)	bulk RNA (mix RNA samples)		Argentina	IPK Gatersleben, Germany	Sequel2 IPK
Hordeum patagonicum	BCC 2065	Isoseq	Diploid	bulk RNA (mix RNA samples)	bulk RNA (mix RNA samples)		Argentina	IPK Gatersleben, Germany	Sequel2 IPK
Hordeum pubiflorum	BCC 2028	Isoseq	Diploid	bulk RNA (mix RNA samples)	bulk RNA (mix RNA samples)		Argentina	IPK Gatersleben, Germany	Sequel2 IPK
Hordeum roshevitzii	BCC 2069	Isoseq	Diploid	bulk RNA (mix RNA samples)	bulk RNA (mix RNA samples)	2022-04-01	China	Beijing, China	Sequel2, Novogene, China
Hordeum californicum	BCC 2058	Isoseq	Diploid	bulk RNA (mix RNA samples)	bulk RNA (mix RNA samples)		USA	IPK Gatersleben, Germany	Sequel2 IPK
Hordeum secalinum	BCC 2004	Isoseq	Tetraploid	bulk RNA (mix RNA samples)	bulk RNA (mix RNA samples)		Spain	IPK Gatersleben, Germany	Sequel2 IPK
Hordeum jubatum	BCC 2055	Isoseq	Tetraploid	bulk RNA (mix RNA samples)	bulk RNA (mix RNA samples)		USA	IPK Gatersleben, Germany	Sequel2 IPK
Hordeum muticum	NGB90062	Isoseq	Diploid	bulk RNA (mix RNA samples)	bulk RNA (mix RNA samples)		Bolivia	IPK Gatersleben, Germany	Sequel2 IPK
Hordeum chilense	GRA 1000	Isoseq	Diploid	bulk RNA (mix RNA samples)	bulk RNA (mix RNA samples)		Unknown	IPK Gatersleben, Germany	Sequel2 IPK
Hordeum flexuosum	BCC 2023	Isoseq	Diploid	bulk RNA (mix RNA samples)	bulk RNA (mix RNA samples)		Argentina	IPK Gatersleben, Germany	Sequel2 IPK
Hordeum cordobense	BCC 2067	Isoseq	Diploid	bulk RNA (mix RNA samples)	bulk RNA (mix RNA samples)		Argentina	IPK Gatersleben, Germany	Sequel2 IPK
Hordeum gussoneanum	BCC 2005	Isoseq	Diploid	bulk RNA (mix RNA samples)	bulk RNA (mix RNA samples)		Spain	IPK Gatersleben, Germany	Sequel2 IPK
Hordeum murinum	BCC 2017	Isoseq	Diploid	bulk RNA (mix RNA samples)	bulk RNA (mix RNA samples)		Tadzhikistan	IPK Gatersleben, Germany	Sequel2 IPK
Hordeum brevisubulatum	PI401390	Isoseq	Diploid	bulk RNA (mix RNA samples)	bulk RNA (mix RNA samples)		Iran	IPK Gatersleben, Germany	Sequel2 IPK
Hordeum marinum	BCC 2001	Isoseq	Diploid	bulk RNA (mix RNA samples)	bulk RNA (mix RNA samples)		Greece	IPK Gatersleben, Germany	Sequel2 IPK
Hordeum erectifolium	BCC 2026 = NGB6816	Isoseq	Diploid	bulk RNA (mix RNA samples)	bulk RNA (mix RNA samples)	2022-04 to 2022-06	Argentina	Duesseldorf, Germany	Sequel II,Genomics & Transcriptomics Laboratory, HHU Düsseldorf (Germany)
Hordeum erectifolium	BCC 2026 = NGB6816	Isoseq	Diploid	bulk RNA (mix RNA samples)	bulk RNA (mix RNA samples)	2022-04 to 2022-06	Argentina	Duesseldorf, Germany	Sequel II,Genomics & Transcriptomics Laboratory, HHU Düsseldorf (Germany)
Hordeum stenostachys	BCC 2041 = NGB90152	Isoseq	Diploid	bulk RNA (mix RNA samples)	bulk RNA (mix RNA samples)	2022-04 to 2022-06	Argentina	Duesseldorf, Germany	Sequel IIe,Genomics & Transcriptomics Laboratory, HHU Düsseldorf (Germany)
Hordeum pusillum	BCC 2043 = NGB6888	Isoseq	Diploid	bulk RNA (mix RNA samples)	bulk RNA (mix RNA samples)	2022-04 to 2022-06	USA	Duesseldorf, Germany	Sequel IIe,Genomics & Transcriptomics Laboratory, HHU Düsseldorf (Germany)
Hordeum intercedens	BCC 2059 = NGB15676	Isoseq	Diploid	bulk RNA (mix RNA samples)	bulk RNA (mix RNA samples)	2022-04 to 2022-06	Mexico	Duesseldorf, Germany	Sequel IIe,Genomics & Transcriptomics Laboratory, HHU Düsseldorf (Germany)
Hordeum euclaston	NGB90233	Isoseq	Diploid	bulk RNA (mix RNA samples)	bulk RNA (mix RNA samples)	2022-04 to 2022-06	Uruguay	Duesseldorf, Germany	Sequel IIe,Genomics & Transcriptomics Laboratory, HHU Düsseldorf (Germany)
Hordeum murinum murinum	BCC 2009	Isoseq	Tetraploid	bulk RNA (mix RNA samples)	bulk RNA (mix RNA samples)	2022-04 to 2022-06	Denmark	Duesseldorf, Germany	Sequel II,Genomics & Transcriptomics Laboratory, HHU Düsseldorf (Germany)
Hordeum murinum murinum	BCC 2009	Isoseq	Tetraploid	bulk RNA (mix RNA samples)	bulk RNA (mix RNA samples)	2022-04 to 2022-06	Denmark	Duesseldorf, Germany	Sequel II,Genomics & Transcriptomics Laboratory, HHU Düsseldorf (Germany)

## Sheet: 5
Summary of gene annotation
Species	Ploidy	Accession Number	Subgenome	Total number of genes	High-confidence number of genes	Low-confidence number of genes	Complete_Pct (BUSCO poales_odb12 )	Single_Copy_Pct (BUSCO poales_odb12)	Duplicated_Pct (BUSCO poales_odb12)	Fragmented_Pct (BUSCO poales_odb12)	Missing_Pct (BUSCO poales_odb12)	Single_pct (OMARK)	Duplicated_pct (OMARK)	Missing_pct (OMARK)	psauron score
Hordeum bogdanii	Diploid	H240	-	91986	46954	45032	98.5	93.8	4.8	0.5	1	85.12	11.56	3.33	92.3
Hordeum brevisubulatum	Diploid	PI401390	-	112043	53340	58703	98.2	92.4	5.8	0.5	1.3	83.19	13.39	3.42	90.5
Hordeum californicum	Diploid	BCC2058	-	81713	41108	40605	98.2	94.3	3.8	0.6	1.3	86.41	9.75	3.84	93
Hordeum chilense	Diploid	GRA1000	-	88947	43644	45303	98.5	94.3	4.3	0.5	1	85.26	10.95	3.79	92.8
Hordeum comosum	Diploid	NGB18417	-	98913	49400	49513	98.2	93.2	5	0.5	1.2	84.92	11.51	3.58	92.1
Hordeum cordobense	Diploid	BCC2067	-	88099	41556	46543	98.5	94.5	4	0.5	1	85.46	10.62	3.93	92.2
Hordeum erectifolium	Diploid	NGB6816	-	98700	46120	52580	97.3	92.5	4.8	0.5	2.2	84.21	11.22	4.57	92.8
Hordeum euclaston	Diploid	NGB90233	-	84864	41402	43462	98.6	94.5	4.1	0.4	1	86.37	9.59	4.04	92.6
Hordeum flexuosum	Diploid	BCC2023	-	87682	43059	44623	98.4	94.3	4.1	0.5	1.1	85.24	10.97	3.78	92.6
Hordeum gussoneanum	Diploid	BCC2005	-	72594	38377	34217	98.6	95.8	2.8	0.4	1	88.51	7.63	3.86	93.8
Hordeum intercedens	Diploid	NGB15676	-	84078	40856	43222	98.2	94.3	3.9	0.5	1.4	86.03	9.86	4.1	92.6
Hordeum jubatum	Tetraploid	BCC2055	-	174194	88732	85462	99.3	4.7	94.6	0.2	0.5	34	64.09	1.9	92.5
Hordeum jubatum	Tetraploid	BCC2055	Subgenome1	84317	42874	41443	96.2	92.6	3.6	1	2.8	84.88	10.17	4.95	92.3
Hordeum jubatum	Tetraploid	BCC2055	Subgenome2	90955	46533	44422	97.9	92.7	5.2	0.7	1.5	84.87	11.81	3.32	92.1
Hordeum marinum	Diploid	BCC2001	-	67062	36808	30254	98.5	95.5	3.1	0.4	1	88.41	7.54	4.05	93.3
Hordeum marinum	Diploid	H559	-	65352	35790	29562	98.4	95.5	2.9	0.4	1.2	88.02	7.87	4.11	93.9
Hordeum murinum	Tetraploid	BCC2009	-	128492	70650	57842	99.1	4	95.1	0.3	0.6	30.85	66.78	2.37	93.7
Hordeum murinum	Tetraploid	BCC2009	Subgenome1	67646	36387	31259	98	95.1	2.9	0.7	1.3	87.7	8.07	4.23	93.2
Hordeum murinum	Tetraploid	BCC2009	Subgenome2	64014	36136	27878	97.1	94.4	2.7	1	1.9	87.29	8.37	4.33	93.5
Hordeum murinum	Diploid	BCC2017	-	65774	35573	30201	98.3	95.3	2.9	0.4	1.4	87.57	8	4.42	93.2
Hordeum muticum	Diploid	NGB90062	-	90195	43339	46856	98.3	93.8	4.5	0.5	1.1	85.63	10.67	3.7	92.2
Hordeum patagonicum	Diploid	BCC2065	-	99861	49366	50495	98.3	93.5	4.8	0.7	1.1	84.51	11.83	3.66	92.2
Hordeum pubiflorum	Diploid	BCC2028	-	100250	49043	51207	98.2	93.7	4.5	0.6	1.2	85.21	11.29	3.49	92.3
Hordeum pusillum	Diploid	NGB6888	-	78641	38681	39960	98.5	95.4	3.2	0.5	1	86.68	9.23	4.09	92.4
Hordeum roshevitzii	Diploid	BCC2069	-	93855	47883	45972	98.6	94.2	4.4	0.4	1.1	85.48	11.29	3.24	92.3
Hordeum secalinum	Tetraploid	BCC2004	-	159990	82210	77780	99.3	5.8	93.5	0.2	0.5	33.03	65.24	1.73	93.4
Hordeum secalinum	Tetraploid	BCC2004	Subgenome1	79184	40359	38825	97.7	94.2	3.5	0.8	1.5	87.17	8.85	3.98	93.9
Hordeum secalinum	Tetraploid	BCC2004	Subgenome2	88285	44488	43797	96.7	92.2	4.5	1.2	2.1	84.36	12.24	3.4	92.5
Hordeum stenostachys	Diploid	NGB90152	-	96254	45630	50624	98.3	93.3	5	0.4	1.2	84.43	11.93	3.64	92.6

## Sheet: 6
Summary of the transposable element annotation.
Species	Ploidy	Accession Number	Copia	Gypsy	LTR unknown	CACTA	Mutator	PIF Harbinger	Tc1 Mariner	hAT	unknown	low complexity	SINEs	helitron	Total
Hordeum vulgare	Diploid	Morex	0.2283	0.4809	0.0403	0.0748	0.0152	0.0113	0.0088	0.0034	0.0003	0.0028	0.0064	0.0091	0.8816
Hordeum bogdanii	Diploid	H240	0.1382	0.4031	0.0899	0.1166	0.0284	0.0131	0.0103	0.0049	0.0001	0.0127	0.0038	0.0116	0.8327
Hordeum brevisubulatum	Diploid	PI401390	0.1427	0.4065	0.0835	0.0863	0.0671	0.0137	0.0126	0.0053	0.0001	0.008	0.0039	0.0125	0.8424
Hordeum bulbosum	Diploid	FB19-011-3	0.1823	0.507	0.0423	0.0633	0.0238	0.013	0.0099	0.0038	0.0003	0.0106	0.0052	0.0074	0.869
Hordeum californicum	Diploid	BCC2058	0.2049	0.4116	0.081	0.105	0.0208	0.012	0.0085	0.0041	0.0001	0.0085	0.0033	0.0091	0.8688
Hordeum chilense	Diploid	GRA1000	0.1395	0.4321	0.084	0.117	0.0273	0.0126	0.0093	0.0047	0.0001	0.0119	0.0045	0.0093	0.8523
Hordeum comosum	Diploid	NGB18417	0.1373	0.4175	0.1091	0.1134	0.0277	0.0127	0.0097	0.0047	0.0001	0.0082	0.0042	0.0099	0.8547
Hordeum cordobense	Diploid	BCC2067	0.1284	0.4327	0.0881	0.1366	0.025	0.0116	0.0086	0.0043	0.0001	0.0082	0.0039	0.0083	0.8557
Hordeum erectifolium	Diploid	NGB6816	0.1385	0.4184	0.0868	0.1282	0.028	0.0115	0.0086	0.0048	0.0001	0.009	0.004	0.0088	0.8466
Hordeum euclaston	Diploid	NGB90233	0.1442	0.4239	0.0768	0.1109	0.0303	0.0146	0.0103	0.0049	0.0001	0.0056	0.0047	0.0104	0.8366
Hordeum flexuosum	Diploid	BCC2023	0.1437	0.4337	0.083	0.1121	0.0281	0.0127	0.0093	0.0048	0.0001	0.0093	0.0043	0.0095	0.8504
Hordeum gussoneanum	Diploid	BCC2005	0.2636	0.4505	0.0481	0.0759	0.0137	0.0102	0.0069	0.003	0.0002	0.0053	0.0043	0.0077	0.8893
Hordeum intercedens	Diploid	NGB15676	0.1475	0.4244	0.0774	0.1082	0.0293	0.0144	0.0103	0.0048	0.0001	0.0057	0.0049	0.0101	0.8371
Hordeum jubatum	Tetraploid	BCC2055	0.1758	0.4003	0.0931	0.119	0.0248	0.0129	0.0099	0.0048	0.0001	0.0043	0.0041	0.0109	0.86
Hordeum marinum	Diploid	BCC2001	0.2755	0.3948	0.053	0.0905	0.0156	0.0115	0.0077	0.0035	0.0002	0.0078	0.0047	0.0086	0.8736
Hordeum murinum	Tetraploid	BCC2009	0.2498	0.365	0.0457	0.1411	0.0182	0.0114	0.0083	0.0038	0.0002	0.0221	0.0042	0.0078	0.8775
Hordeum murinum	Diploid	BCC2017	0.2447	0.3662	0.0439	0.142	0.0226	0.0123	0.0083	0.004	0.0002	0.0129	0.0043	0.0083	0.8698
Hordeum muticum	Diploid	NGB90062	0.1264	0.4226	0.0986	0.1433	0.0262	0.0114	0.0086	0.0044	0.0001	0.0099	0.0042	0.0086	0.8641
Hordeum patagonicum	Diploid	BCC2065	0.1397	0.4176	0.1037	0.1178	0.0281	0.0125	0.0096	0.0051	0.0001	0.0074	0.0043	0.0096	0.8554
Hordeum pubiflorum	Diploid	BCC2028	0.1333	0.4292	0.0925	0.1195	0.0276	0.0131	0.0099	0.0052	0.0001	0.009	0.0044	0.01	0.8538
Hordeum pusillum	Diploid	NGB6888	0.1459	0.4331	0.0794	0.1075	0.0261	0.0141	0.0099	0.0049	0.0001	0.008	0.005	0.0097	0.8438
Hordeum roshevitzii	Diploid	BCC2069	0.1734	0.3956	0.0844	0.1104	0.0294	0.0131	0.0099	0.0057	0.0002	0.0127	0.0043	0.012	0.851
Hordeum secalinum	Tetraploid	BCC2004	0.2029	0.4498	0.0723	0.0816	0.0183	0.0113	0.0082	0.004	0.0002	0.0106	0.0041	0.0093	0.8726
Hordeum stenostachys	Diploid	NGB90152	0.1454	0.4083	0.1025	0.1189	0.0304	0.0116	0.0087	0.0047	0.0001	0.0078	0.004	0.0088	0.8512
Hordeum marinum	Diploid	H559	0.2858	0.4022	0.044	0.095	0.0161	0.0115	0.0077	0.0036	0.0002	0.0001	0.005	0.0086	0.8796

## Sheet: 7
Number of identified PPR, RFL-PPR, mTERF and RFL-mTERF genes in Hordeum pangenome.
Species	Genome group	PLS(>240)*	P (>100)*	RFL(>100)*	mTERFs(>100aa)**	non-RFL-mTERFs(>100aa)	RFL-mTERFs(>100aa)	mTERFs_chr6(>100aa)
Hordeum_vulgare_Morex	H	256	203	26	67	25	42	32
Hordeum_bulbosum_FB19_hap1	H	227	198	23	84	22	62	44
Hordeum_bulbosum_FB19_hap2	H	266	206	27	74	21	53	31
Hordeum_bogdanii_H240	I	258	247	62	124	27	97	82
Hordeum_comosum_NGB	I	251	266	77	136	23	113	99
Hordeum_patagonicum_magellanicum	I	260	249	63	130	32	98	85
Hordeum_roshevitzii_BCC	I	254	250	52	98	23	75	60
Hordeum_pubiflorum_BCC	I	253	262	71	114	22	92	80
Hordeum_euclaston_NGB90233	I	248	250	69	102	23	79	66
Hordeum_intercedens_NGB15676	I	250	236	56	94	21	73	61
Hordeum_pusillum_NGB6888	I	245	241	65	87	22	65	53
Hordeum_californicum_BCC2058	I	252	268	54	100	19	81	65
Hordeum_chilense_GRA1000	I	307	254	70	159	47	112	98
Hordeum_muticum_NGB90062	I	260	239	54	124	30	94	79
Hordeum_cordobense_BCC2067	I	254	245	65	105	23	82	66
Hordeum_flexuosum_BCC2023	I	248	261	77	116	24	92	80
Hordeum_erectifolium_NGB6816	I	256	278	89	167	23	144	126
Hordeum_stenostachys_NGB90152	I	260	264	85	126	23	103	89
Hordeum_jubatum_BCC2055_sub1	I	212	231	54	105	19	86	68
Hordeum_jubatum_BCC2055_sub2	I	257	244	66	127	24	103	90
Hordeum_brevisubulatum_PI401390	I	256	269	61	134	24	110	92
Hordeum_secalinum_BCC2004_sub2	I	258	235	62	97	21	76	63
Hordeum_secalinum_BCC2004_sub1	Xa	241	214	38	121	23	98	81
Hordeum_gussoneanum_BCC2005	Xa	243	214	43	106	22	84	64
Hordeum_marinum_H559	Xa	237	196	28	88	22	66	54
Hordeum_marinum_BCC2001	Xa	239	208	34	86	21	65	49
Hordeum_murinum_BCC2017	Xu	244	213	42	79	23	56	42
Hordeum_murinum_BCC2009_sub1	Xu	244	215	44	82	24	58	46
Hordeum_murinum_BCC2009_sub2	Xu	244	222	46	80	20	60	47
* hmmsearch score
** 100 amino acids or more

## Sheet: 8
Summary of Hordeum species divergence time.
Clade	Ages Myr (95% HPD)
Hordeum /Sorghum bicolor	49.8(44.4-52.3)
Hordeum /Oryza sativa	45.8(41.3-50.9)
Hordeum /Brachypodium distachyon	33.6(29.6-35.6)
Hordeum /Triticum monococcum	16.1(12.1-18.3)
Hordeum / Hordeum	12.4(9.1-14.5)
H/Xu	10.3(7.4-12.2)
I/Xa	9.2(6.4-11.1)
Hordeum roshevitzii/Hordeum euclaston	6.7(4.6-8.3)
Hordeum roshevitzii/Hordeum brevisubulatum	6.0(4.1-7.5)
Hordeum secalinum Sub2/Hordeum euclaston	6.0(4.1-7.5)
Hordeum murinum Sub1/Hordeum murinum Sub2	5.9(3.4-8.5)
Hordeum vulgare/Hordeum bulbosum	5.5(3.6-8.2)
Hordeum roshevitzii/Hordeum bogdanii	5.0(3.4-6.3)
Hordeum californicum/Hordeum euclaston	4.5(3.0-5.7)
Hordeum marinum/Hordeum gussoneanum	4.2(2.8-6.0)
Hordeum jubatum Sub2/Hordeum roshevitzii	3.3(2.1-4.4)
Hordeum euclaston/Hordeum cordobense	2.4(1.6-2.9)
Hordeum cordobense/Hordeum muticum	2.1(1.4-2.7)
Hordeum comosum/Hordeum euclaston	1.7(1.1-2.1)
Hordeum jubatum Sub1/Hordeum californicum	1.5(0.8-2.3)
Hordeum patagonicum/Hordeum euclaston	1.5(1.0-1.9)
Hordeum flexuosum/Hordeum euclaston	1.4(1.0-1.8)
Hordeum pubiflorum/Hordeum patagonicum	1.3(0.8-1.6)
Hordeum euclaston/Hordeum stenostachys	1.0(0.6-1.2)
Hordeum euclaston/Hordeum pusillum	0.9(0.6-1.1)
Hordeum gussoneanum/Hordeum secalinum Sub1	0.8(0.4-1.3)
Hordeum erectifolium/Hordeum stenostachys	0.7(0.5-0.9)
Hordeum murinum Sub1/Hordeum murinum diploid	0.6(0.2-1.0)
Hordeum flexuosum/Hordeum chilense	0.6(0.4-0.9)
Hordeum euclaston/Hordeum intercedens	0.3(0.2-0.5)

## Sheet: 9
Overview of proximal region boundaries in Hordeum.
Chromosome	Start (Mb)	End (Mb)	Species
chr1H	165	225	Hordeum_bogdanii
chr2H	205	300	Hordeum_bogdanii
chr3H	195	275	Hordeum_bogdanii
chr4H	150	370	Hordeum_bogdanii
chr5H	150	230	Hordeum_bogdanii
chr6H	210	300	Hordeum_bogdanii
chr7H	255	330	Hordeum_bogdanii
chr1H	150	205	Hordeum_brevisubulatum
chr2H	190	285	Hordeum_brevisubulatum
chr3H	190	275	Hordeum_brevisubulatum
chr4H	120	335	Hordeum_brevisubulatum
chr5H	140	190	Hordeum_brevisubulatum
chr6H	220	300	Hordeum_brevisubulatum
chr7H	235	300	Hordeum_brevisubulatum
chr1H	150	190	Hordeum_bulbosum_Hap1
chr2H	205	280	Hordeum_bulbosum_Hap1
chr3H	190	255	Hordeum_bulbosum_Hap1
chr4H	140	280	Hordeum_bulbosum_Hap1
chr5H	150	185	Hordeum_bulbosum_Hap1
chr6H	185	240	Hordeum_bulbosum_Hap1
chr7H	250	280	Hordeum_bulbosum_Hap1
chr1H	125	190	Hordeum_californicum
chr2H	205	305	Hordeum_californicum
chr3H	175	255	Hordeum_californicum
chr4H	130	330	Hordeum_californicum
chr5H	125	160	Hordeum_californicum
chr6H	200	265	Hordeum_californicum
chr7H	250	325	Hordeum_californicum
chr1H	120	170	Hordeum_chilense
chr2H	200	300	Hordeum_chilense
chr3H	170	250	Hordeum_chilense
chr4H	120	310	Hordeum_chilense
chr5H	125	160	Hordeum_chilense
chr6H	195	275	Hordeum_chilense
chr7H	230	285	Hordeum_chilense
chr1H	115	135	Hordeum_comosum
chr1H	150	195	Hordeum_comosum
chr2H	215	320	Hordeum_comosum
chr3H	165	250	Hordeum_comosum
chr4H	115	290	Hordeum_comosum
chr4H	300	345	Hordeum_comosum
chr5H	120	175	Hordeum_comosum
chr6H	195	270	Hordeum_comosum
chr7H	235	295	Hordeum_comosum
chr1H	125	180	Hordeum_cordobense
chr2H	200	305	Hordeum_cordobense
chr3H	185	290	Hordeum_cordobense
chr4H	125	350	Hordeum_cordobense
chr5H	115	155	Hordeum_cordobense
chr6H	220	310	Hordeum_cordobense
chr7H	255	330	Hordeum_cordobense
chr1H	125	175	Hordeum_erectifolium
chr2H	225	345	Hordeum_erectifolium
chr3H	275	360	Hordeum_erectifolium
chr4H	125	345	Hordeum_erectifolium
chr5H	130	170	Hordeum_erectifolium
chr6H	235	305	Hordeum_erectifolium
chr7H	240	295	Hordeum_erectifolium
chr1H	80	135	Hordeum_euclaston
chr2H	155	220	Hordeum_euclaston
chr3H	195	275	Hordeum_euclaston
chr4H	90	240	Hordeum_euclaston
chr5H	85	130	Hordeum_euclaston
chr6H	165	230	Hordeum_euclaston
chr7H	190	230	Hordeum_euclaston
chr1H	120	175	Hordeum_flexuosum
chr2H	200	300	Hordeum_flexuosum
chr3H	170	240	Hordeum_flexuosum
chr4H	110	305	Hordeum_flexuosum
chr5H	115	150	Hordeum_flexuosum
chr6H	200	275	Hordeum_flexuosum
chr7H	215	270	Hordeum_flexuosum
chr1H	120	175	Hordeum_gussoneanum
chr2H	205	315	Hordeum_gussoneanum
chr3H	195	280	Hordeum_gussoneanum
chr4H	120	135	Hordeum_gussoneanum
chr4H	150	355	Hordeum_gussoneanum
chr5H	125	190	Hordeum_gussoneanum
chr6H	225	320	Hordeum_gussoneanum
chr7H	265	370	Hordeum_gussoneanum
chr1H	90	140	Hordeum_intercedens
chr2H	150	215	Hordeum_intercedens
chr3H	180	275	Hordeum_intercedens
chr4H	95	240	Hordeum_intercedens
chr5H	90	140	Hordeum_intercedens
chr6H	160	235	Hordeum_intercedens
chr7H	190	235	Hordeum_intercedens
chr1H	105	135	Hordeum_jubatum_Sub1
chr1H	150	185	Hordeum_jubatum_Sub1
chr2H	195	290	Hordeum_jubatum_Sub1
chr3H	170	230	Hordeum_jubatum_Sub1
chr4H	120	325	Hordeum_jubatum_Sub1
chr5H	130	165	Hordeum_jubatum_Sub1
chr6H	190	260	Hordeum_jubatum_Sub1
chr7H	250	315	Hordeum_jubatum_Sub1
chr1H	150	195	Hordeum_jubatum_Sub2
chr2H	200	215	Hordeum_jubatum_Sub2
chr2H	225	305	Hordeum_jubatum_Sub2
chr3H	180	260	Hordeum_jubatum_Sub2
chr4H	120	325	Hordeum_jubatum_Sub2
chr5H	130	175	Hordeum_jubatum_Sub2
chr6H	225	300	Hordeum_jubatum_Sub2
chr7H	255	320	Hordeum_jubatum_Sub2
chr1H	115	175	Hordeum_marinum_BCC2001
chr2H	195	290	Hordeum_marinum_BCC2001
chr3H	165	250	Hordeum_marinum_BCC2001
chr4H	115	315	Hordeum_marinum_BCC2001
chr5H	125	170	Hordeum_marinum_BCC2001
chr6H	185	270	Hordeum_marinum_BCC2001
chr7H	240	340	Hordeum_marinum_BCC2001
chr1H	150	200	Hordeum_murinum_BCC2017
chr2H	180	280	Hordeum_murinum_BCC2017
chr3H	190	275	Hordeum_murinum_BCC2017
chr4H	110	305	Hordeum_murinum_BCC2017
chr5H	130	185	Hordeum_murinum_BCC2017
chr6H	180	280	Hordeum_murinum_BCC2017
chr7H	250	325	Hordeum_murinum_BCC2017
chr7H	335	355	Hordeum_murinum_BCC2017
chr1H	155	210	Hordeum_murinum_Sub1
chr2H	180	285	Hordeum_murinum_Sub1
chr3H	195	280	Hordeum_murinum_Sub1
chr4H	110	325	Hordeum_murinum_Sub1
chr5H	140	190	Hordeum_murinum_Sub1
chr6H	180	280	Hordeum_murinum_Sub1
chr7H	265	335	Hordeum_murinum_Sub1
chr7H	345	365	Hordeum_murinum_Sub1
chr1H	170	210	Hordeum_murinum_Sub2
chr1H	220	245	Hordeum_murinum_Sub2
chr2H	210	330	Hordeum_murinum_Sub2
chr3H	205	305	Hordeum_murinum_Sub2
chr4H	165	400	Hordeum_murinum_Sub2
chr5H	150	220	Hordeum_murinum_Sub2
chr6H	225	320	Hordeum_murinum_Sub2
chr7H	275	405	Hordeum_murinum_Sub2
chr1H	120	175	Hordeum_muticum
chr2H	220	330	Hordeum_muticum
chr3H	215	295	Hordeum_muticum
chr4H	125	350	Hordeum_muticum
chr5H	125	170	Hordeum_muticum
chr6H	220	300	Hordeum_muticum
chr7H	275	335	Hordeum_muticum
chr1H	140	205	Hordeum_patagonicum
chr2H	220	325	Hordeum_patagonicum
chr3H	175	255	Hordeum_patagonicum
chr4H	120	330	Hordeum_patagonicum
chr5H	125	170	Hordeum_patagonicum
chr6H	205	285	Hordeum_patagonicum
chr7H	250	320	Hordeum_patagonicum
chr1H	120	175	Hordeum_pubiflorum
chr2H	185	285	Hordeum_pubiflorum
chr3H	160	235	Hordeum_pubiflorum
chr4H	130	310	Hordeum_pubiflorum
chr5H	115	150	Hordeum_pubiflorum
chr6H	185	260	Hordeum_pubiflorum
chr7H	220	300	Hordeum_pubiflorum
chr1H	80	130	Hordeum_pusillum
chr2H	145	230	Hordeum_pusillum
chr3H	200	250	Hordeum_pusillum
chr3H	265	290	Hordeum_pusillum
chr4H	95	260	Hordeum_pusillum
chr5H	90	115	Hordeum_pusillum
chr6H	160	225	Hordeum_pusillum
chr7H	195	240	Hordeum_pusillum
chr1H	165	215	Hordeum_roshevitzii
chr2H	210	300	Hordeum_roshevitzii
chr3H	195	270	Hordeum_roshevitzii
chr4H	135	320	Hordeum_roshevitzii
chr4H	335	355	Hordeum_roshevitzii
chr5H	145	200	Hordeum_roshevitzii
chr6H	205	305	Hordeum_roshevitzii
chr7H	242	315	Hordeum_roshevitzii
chr1H	130	195	Hordeum_secalinum_Sub1
chr2H	230	340	Hordeum_secalinum_Sub1
chr3H	220	310	Hordeum_secalinum_Sub1
chr4H	135	150	Hordeum_secalinum_Sub1
chr4H	165	375	Hordeum_secalinum_Sub1
chr5H	150	215	Hordeum_secalinum_Sub1
chr6H	240	340	Hordeum_secalinum_Sub1
chr7H	290	405	Hordeum_secalinum_Sub1
chr1H	145	205	Hordeum_secalinum_Sub2
chr2H	200	300	Hordeum_secalinum_Sub2
chr3H	170	255	Hordeum_secalinum_Sub2
chr4H	125	365	Hordeum_secalinum_Sub2
chr5H	125	170	Hordeum_secalinum_Sub2
chr6H	180	280	Hordeum_secalinum_Sub2
chr7H	245	295	Hordeum_secalinum_Sub2
chr1H	125	190	Hordeum_stenostachys
chr2H	210	315	Hordeum_stenostachys
chr3H	270	350	Hordeum_stenostachys
chr4H	125	340	Hordeum_stenostachys
chr5H	125	170	Hordeum_stenostachys
chr6H	240	310	Hordeum_stenostachys
chr7H	245	315	Hordeum_stenostachys
chr1H	170	230	Hordeum_vulgare
chr2H	230	355	Hordeum_vulgare
chr3H	210	325	Hordeum_vulgare
chr4H	160	395	Hordeum_vulgare
chr5H	155	265	Hordeum_vulgare
chr6H	195	310	Hordeum_vulgare
chr7H	270	365	Hordeum_vulgare

## Sheet: 10
Genome sources – list of genomes used in phylogenetic validation of HGT candidates.
Genus	Species	Source	Id	Subfamily	Tribe
Phragmites	australis	NCBI	GCF_958298935.1	Arundinoideae	Molinieae
Phyllostachys	edulis	CoGe	67928	Bambusoideae	Arundinarieae
Olyra	latifolia	CoGe	66510	Bambusoideae	Olyreae
Ananas	comusus	NCBI	GCF_001540865.1	Bromeliaceae	-
Oropetium	thomaeum	Phytozome	V1.0	Choridoideae	Cynodonteae
Musa	acuminata	Phyttozome	V1.	Musaceae	-
Oryza	sativa	NCBI	GCF_001433935.1	Oryzoideae	Oryzeae
Zizania	palustris	NCBI	GCA_019279435.1	Oryzoideae	Oryzeae
Sorghum	bicolor	NCBI	GCF_000003195.3	Panicoideae	Andropogoneae
Zea	mays	NCBI	GCF_902167145.1	Panicoideae	Andropogoneae
Panicum	hallii	Phytozome	V3.2	Panicoideae	Paniceae
Panicum	virgatum	Phytozome	V5.1	Panicoideae	Paniceae
Setaria	italica	Phytozome	V2.2	Panicoideae	Paniceae
Setaria	viridis	Phytozome	V4.1	Panicoideae	Paniceae
Urochloa	fusca	Phytozome	V1.1	Panicoideae	Paniceae
Paspalum	notatum	NCBI	GCA_036689595.1	Panicoideae	Paspaleae
Paspalum	vaginatum	Phytozome	V3.1	Panicoideae	Paspaleae
Pharus	latifolius	Phytozome	V1.1	Pharoideae	Phareae
Brachypodium	distachyon	NCBI	GCF_000005505.3	Pooideae	Brachypodieae
Avena	longiglumis	GrainGenes	CN58138	Pooideae	Poeae
Lolium	perenne	NCBI	GCF_019359855.1	Pooideae	Poeae
Aegilops	tauschii	NCBI	GCF_002575655.2	Pooideae	Triticeae
Hordeum	vulgare	Phytozome	Morex V3	Pooideae	Triticeae
Grass classification based on Soreng et al. (2015)

[truncated: 10 more sheets: 11, 12, 13, 14, 15, 16, 17, 18, 19, 20]
